# Supplementary material for: Reduced Prevalence of Diabetic Ketoacidosis at Diagnosis of Type 1 Diabetes in Young Children Participating in Longitudinal Follow-Up
Source: Oxford University Press journal article supplement (doi:10.2337/dc11-1026), 2011-10-05

## SUPPLEMENTARY DATA

### Members of the Teddy Study Group

**Colorado Clinical Center:** Marian Rewers, M.D., Ph.D., PI<sup>1,4,6,10,11</sup>, Katherine Barriga<sup>12</sup>, Judith Baxter<sup>9,12,15</sup>, George Eisenbarth, M.D., Ph.D., Nicole Frank<sup>2</sup>, Patricia Gesualdo<sup>2,6,12,14,15</sup>, Michelle Hoffman<sup>12,13,14</sup>, Lisa Ide, Jill Norris, Ph.D.<sup>2,12</sup>, Jessie Robinson<sup>12</sup>, Kathleen Waugh<sup>7,12,15</sup>. University of Colorado at Denver and Health Sciences Center, Barbara Davis Center for Childhood Diabetes.

**Georgia/Florida Clinical Center:** Jin-Xiong She, Ph.D., PI<sup>1,3,4,11</sup>, Desmond Schatz, M.D.\*<sup>4,5,7,8</sup>, Diane Hopkins<sup>12</sup>, Leigh Steed<sup>6,12,13,14,15</sup>, Jamie Thomas\*<sup>12</sup>, Katherine Silvis<sup>2</sup>, Meena Shankar\*<sup>2</sup>, Hong-Jie Wang, Kim English, Richard McIndoe, Ph.D., Angela Dequesada\*<sup>12</sup>, Michael Haller, M.D.\*<sup>14</sup>, Stephen W. Anderson, M.D.<sup>^</sup> Medical College of Georgia, \*University of Florida, ^Pediatric Endocrine Associates, Atlanta.

**Germany Clinical Center:** Anette G. Ziegler, M.D., PI<sup>1,3,4,11</sup>, Heike Boerschmann<sup>14</sup>, Ezio Bonifacio, Ph.D.\*<sup>5</sup>, Melanie Bunk, Johannes Försch, Lydia Henneberger<sup>2,12</sup>, Michael Hummel, M.D.<sup>13</sup>, Sandra Hummel, Ph.D.<sup>2</sup>, Gesa Joslowski<sup>¥2</sup>, Mathilde Kersting Ph.D.<sup>¥2</sup>, Andres Kis, Annette Knopff<sup>7</sup>, Nadja Kocher, Sibylle Koletzko, M.D.<sup>¶13</sup>, Stephanie Krause, Claudia Lauber, Ulrike Mollenhauer, Claudia Peplow\*, Maren Pflüger<sup>6</sup>, Daniela Pöhlmann, Claudia Ramminger, Ekrem Shabanaj, Elisabeth Strauss, Sargol Rash-Sur, Roswith Roth, Ph.D.<sup>^9</sup>, Julia Schenkel, Katja Voit, Christiane Winkler Ph.D.<sup>2,12,15</sup>, Marina Zwilling, Diabetes Research Institute, \*Center for Regenerative Therapies, TU Dresden, ^Institute of Psychology, University of Graz, Austria, ¶Dr. von Hauner Children's Hospital, Department of Gastroenterology, Ludwig Maximilians University Munich, ¥Research Institute for Child Nutrition, Dortmund.

**Finland Clinical Center:** Olli G. Simell, M.D., Ph.D., PI<sup>¥^1,4,11,13</sup>, Kirsti Nanto-Salonen, M.D., Ph.D.<sup>¥^12</sup>, Jorma Ilonen, M.D., Ph.D.<sup>¥^¶3</sup>, Mikael Knip, M.D., Ph.D.\*<sup>±</sup>, Riitta Veijola, M.D., Ph.D.<sup>µ²</sup>, Tuula Simell, Ph.D.<sup>¥^9,12</sup>, Heikki Hyöty, M.D., Ph.D.\*<sup>±6</sup>, Suvi M. Virtanen, M.D., Ph.D.\*<sup>§2</sup>, Carina Kronberg-Kippilä<sup>§2</sup>, Maija Torma<sup>¥^12,14</sup>, Barbara Simell<sup>¥^12,15</sup>, Eeva Ruohonen<sup>¥^</sup>, Minna Romo<sup>¥^</sup>, Elina Mantymäki<sup>¥^</sup>, Heidi Schroderus\*<sup>±</sup>, Mia Nyblom\*<sup>±</sup>, Aino Stenius<sup>µ²</sup>. ¥University of Turku, \*University of Tampere, µUniversity of Oulu, ^Turku University Hospital, ±Tampere University Hospital, ²Oulu University Hospital, §National Public Health Institute, Finland, ¶University of Kuopio.

**Sweden Clinical Center:** Åke Lernmark, Ph.D., PI<sup>1,3,4,8,10,11,15</sup>, Daniel Agardh, M.D., Ph.D.<sup>13</sup>, Peter Almgren, Eva Andersson, Carin Andrén-Aronsson<sup>2,13</sup>, Maria Ask, Ulla-Marie Karlsson, Corrado Cilio, M.D.<sup>5</sup>, Ph.D., Jenny Bremer, Emilie Ericson-Hallström, Thomas Gard, Joanna Gerardsson, Ulrika Gustavsson, Gertie Hansson<sup>12,14</sup>, Monica Hansen, Susanne Hyberg, Rasmus Håkansson, Sten Ivarsson, M.D., Ph.D.<sup>6</sup>, Fredrik Johansen, Linda Jonsson, Helena Larsson M.D., Ph.D.<sup>14</sup>, Barbro Lernmark, Ph.D.<sup>9,12</sup>, Maria Markan, Theodosia Massadakis, Jessica Melin, Maria Månsson-Martinez, Anita Nilsson, Kobra Rahmati, Anna Rosenquist, Monica Sedig Järvirova, Sara Sibthorpe, Birgitta Sjöberg, Carina Törn, Ph.D.<sup>3,15</sup>, Anne Wallin, Åsa Wimar, Sofie Åberg. Lund University.

**Washington Clinical Center:** William A. Hagopian, M.D., Ph.D., PI<sup>1,3,4,5,6,7,11,13,14</sup>, Xiang Yan, M.D., Michael Killian<sup>6,7,12,13</sup>, Claire Cowen Crouch<sup>12,14,15</sup>, Kristen M. Hay<sup>2</sup>, Stephen Ayres, Carissa Adams, Brandi Bratrude, David Coughlin, Greer Fowler, Czarina Franco, Carla Hammar, Diana Heaney, Patrick Marcus, Arlene Meyer, Denise Mulenga, Elizabeth Scott, Jennifer Skidmore, Joshua Stabbert, Viktoria Stepitova, Nancy Williams. Pacific Northwest Diabetes Research Institute.

**Pennsylvania Satellite Center:** Dorothy Becker, M.D., Margaret Franciscus<sup>12</sup>, MaryEllen Dalmagro-Elias<sup>2</sup>, Ashi Daftary, M.D. Children's Hospital of Pittsburgh of UPMC.

## SUPPLEMENTARY DATA

**Data Coordinating Center:** Jeffrey P. Krischer, Ph.D.,<sup>1,4,5,10,11</sup> Michael Abbondandolo, Lori Ballard<sup>3,9,14,15</sup>, Rasheedah Brown<sup>12,15</sup>, David Cuthbertson, Christopher Eberhard, Veena Gowda, Hye-Seung Lee, Ph.D.<sup>3,6,13,15</sup>, Shu Liu, Kristian Lynch, Ph.D.<sup>9</sup>, Jamie Malloy, Cristina McCarthy<sup>12,15</sup>, Wendy McLeod<sup>2,5,6,13,15</sup>, Laura Smith, Ph.D.<sup>9</sup>, Stephen Smith, Susan Smith<sup>12,15</sup>, Ulla Uusitalo, Ph.D.<sup>2,15</sup>, Kendra Vehik, Ph.D.<sup>4,5,9,14,15</sup>, Earnest Washington, Jimin Yang, Ph.D.<sup>2,15</sup>. University of South Florida.

**Project officer:** Beena Akolkar, Ph.D.<sup>1,3,4,5,7,10,11</sup>, National Institutes of Diabetes and Digestive and Kidney Diseases.

**Other contributors:** Thomas Briese, Ph.D.<sup>6,15</sup>, Columbia University, Henry Erlich, Ph.D.<sup>3</sup>, Children's Hospital Oakland Research Institute, Suzanne Bennett Johnson, Ph.D.<sup>9,12</sup>, Florida State University, Steve Oberste, Ph.D.<sup>6</sup>, Centers for Disease Control and Prevention.

### **Committees:**

<sup>1</sup>Ancillary Studies, <sup>2</sup>Diet, <sup>3</sup>Genetics <sup>4</sup>Human Subjects/Publicity/Publications, <sup>5</sup>Immune Markers, <sup>6</sup>Infectious Agents, <sup>7</sup>Laboratory Implementation, <sup>8</sup>Maternal Studies, <sup>9</sup>Psychosocial, <sup>10</sup>Quality Assurance, <sup>11</sup>Steering, <sup>12</sup>Study Coordinators, <sup>13</sup>Celiac Disease, <sup>14</sup>Clinical Implementation, <sup>15</sup>Quality Assurance Subcommittee on Data Quality.

### **Members of the Finnish Pediatric Diabetes Register**

*Principal Investigator:* Mikael Knip (Children's Hospital, University of Helsinki and Helsinki University Central Hospital)

*Steering Committee:* Per-Henrik Groop (Folkhälsan Research Institute), Jorma Ilonen (Immunogenetics Laboratory, University of Turku), Anneli Lappi (Children's Hospital, Helsinki University Central Hospital), Marja-Terttu Saha (Department of Pediatrics, Tampere University Hospital), Olli Simell (Chair, Department of Pediatrics, Turku University Central Hospital), Timo Otonkoski (Children's Hospital, Helsinki University Central Hospital), Timo Talvitie (Department of Pediatrics, South Ostrobothnia Central Hospital), Outi Vaarala (Immune Response Unit, National Public Health Institute), Riitta Veijola (Department of Pediatrics, Oulu University Hospital),

*Locally responsible investigators:* Henrikka Aito (Department of Pediatrics, Porvoo Hospital), Johanna Granvik (Department of Pediatrics, Jakobstad Hospital), Maarit Haapalehto-Ikonen (Department of Pediatrics, Rauma Hospital), Samuli Ylitalo (Department of Pediatrics, Satakunta Central Hospital), Christian Johansson (Department of Pediatrics, Åland Central Hospital), Sirpa Tenhola (Department of Pediatrics, Kymenlaakso Central Hospital), Thomas Dahllund (Department of Paediatrics, Västra Nyland Hospital), Anne Kinnala (Department of Pediatrics, Salo Hospital), Hanna Huopio (Department of Pediatrics, Kuopio University Hospital), Niina Vuorela (Department of Pediatrics, Kanta-Häme Central Hospital), Pentti Lautala (Department of Pediatrics, Päijät-Häme Central Hospital), Kaija Lindström (Department of Pediatrics, Hyvinkää Hospital), Anja Nuuja (Department of Pediatrics, Central Hospital of Central Finland), Päivi Nykänen (Department of Pediatrics, Mikkeli Central Hospital), Maarit Korteniemi (Department of Pediatrics, Central Hospital of Lapland), Anne-Putto-Laurila (Department of Pediatrics, Turku University Central Hospital), Marja-Terttu Saha (Department of Pediatrics, Tampere University Hospital), Juhani Sankala (Department of Pediatrics, Savonlinna Central Hospital), Päivi Miettinen (Children's Hospital, Helsinki University Central Hospital), Taina Mustila (Department of Pediatrics, Vaasa Central Hospital), Anne-Maarit Suomi (Department of Pediatrics, South Ostrobothnia Central Hospital), Riitta Veijola (Department of Pediatrics, Oulu

## SUPPLEMENTARY DATA

University Hospital), Jussi Korhonen (Department of Pediatrics, North Karelia Central Hospital), Jonas Bondestam (Department of Pediatrics, Lohja Hospital), Pentti Varimo (Department of Pediatrics, Kainuu Central Hospital), Anu-Maaria Hämäläinen (Department of Pediatrics, Jorvi Hospital), Ritva Virransalo (Department of Pediatrics, South Karelia Central Hospital), Pentti Vuolukka (Department of Pediatrics, Länsi-Pohja Central Hospital), Jussi Ojanperä, Department of Pediatrics (Central Ostrobothnia Central Hospital)

### **Members of the German DPV register**

Beate Karges, MD, PhD, Aachen, Gitte Bräucker, MD, Aalen, Desiree Dunstheimer, Augsburg, Gerhard Däublin, MD, Aurich, Walter Burger, MD PhD, Berlin, Holger Haberland, MD, Berlin, Klemens Raile, MD, PhD, Berlin, Norbert Jorch, MD, Bielefeld, Dirk Bierkamp, MD, Bocholt, Eggert Lilienthal, MD, Bochum, Joachim Wölfle, MD, PhD, Bonn, Christian Kastendieck, MD, Wolfgang Marg, MD, Bremen, Christian Vogel, MD, Chemnitz, Michaela Thienelt, MD, Coesfeld, Markus Freff, MD, Darmstadt, Thomas Wiesel, MD, Datteln, Britta Robl, Dortmund, Andrea Naeke, MD, Dresden, Sandra Oesingmann, MD, Düren, Thomas Meissner, MD, PhD, Düsseldorf, Andreas Lemmer, MD, Erfurt, Jürgen Herwig, MD, Frankfurt, Ottfried Schwab, MD PhD, Freiburg, Ulrich Salzberger, MD, Fulda, Matthias Papsch, MD, Gelsenkirchen, Stefan Wudy, MD PhD, Giessen, Andrea Schumacher, MD, Göppingen, Markus Röbl, MD, Göttingen, Ilker Akkurt, MD, Klaus-Peter Otto, MD, Rudolf Lepler, MD, Eva Busemann, MD, Hamburg, Angelika Thon, MD, Olga Kordonouri MD PhD, Hannover, Jürgen Grulich-Henn, MD, Heidelberg, Dörte Hilgard, MD, Herdecke, Andrea Günther-Scholz, MD, Itzehoe, Elke Gens, MD, Karlsburg, Andreas Veigel, MD, Karlsruhe, Martin Schebek, MD, Kassel, Ursula Reiners-Franz, MD, Koblenz, Ora Seewi, MD, Köln, Johannes Hamann, MD, Landshut, Thomas Kapellen, MD, PhD, Leipzig, Ulrich Brand, MD, Ludwigsburg, Vera Wagner, MD, Lübeck, Dagobert Wiemann, MD, Magdeburg, Dorothee Kieninger, MD, Mainz, Katharina Ketteler, MD, Mannheim, Wolfgang Poss, MD, Moers, Ursula Strier, MD, Mönchengladbach, Susanne Bechthold, MD PhD, Katharina Warncke, MD, Michael Busse, MD, Otto Schofer, MD, PhD, Neunkirchen, Renate Meyer, MD, Neuwied, Ingrid Brünstler, MD, Horst Seithe, MD, Nürnberg, Peter Beyer, MD, PhD, Oberhausen, Susanne Büsing, MD, Osnabrück, Johannes Wolf, MD, Paderborn, Frank Eickmeier, MD, Pforzheim, Uta Faller, MD, Ravensburg, Hugo Segerer, MD, PhD, Regensburg, Elke Gericke, MD, Rheine, Joachim Füllenbach, MD, Siegen, Dirk Peters, MD, St. Augustin, Martin Holder, MD, Stuttgart, Karl-Heinz Ludwig, MD, Trier, Andreas Neu, MD PhD, Tübingen, Martin Wabitsch, MD PhD, Ulm, Renate Dürr, MD, Waiblingen, Marianne Becker, MD, Dieter Weitzel, MD PhD, Wiesbaden, Stefan Wirth, MD, PhD, Wuppertal

### **Members of SEARCH for Diabetes in Youth**

The writing group for this manuscript wishes to acknowledge the contributions of the following individuals to the SEARCH for Diabetes in Youth Study:

*California:* Jean M. Lawrence, ScD, MPH, MSSA, Kristi Reynolds, PhD, MPH, Jin-Wen Hsu, PhD, Mary Helen Black, PhD, Kim Holmquist, BA, and Harpreet S. Takhar, MPH, for the Department of Research and Evaluation and Ann K. Kershner, MD for the Department of Pediatrics, Kaiser Permanente Southern California; and David J. Pettitt, MD, for the Sansum Diabetes Research Institute

*Colorado:* Dana Dabelea, MD, PhD, Richard F. Hamman, MD, DrPH, Lisa Testaverde, MS, for the Department of Epidemiology, Colorado School of Public Health, University of Colorado Denver, Georgeanna J. Klingensmith, MD, Marian J. Rewers, MD, PhD, David Maahs, MD and Paul Wadwa, MD for the Barbara Davis Center for Childhood Diabetes, Stephen Daniels, MD, PhD, Kristen Nadeau, MD, Department of Pediatrics and Children's Hospital, Clifford A. Bloch, MD, for the Pediatric

## SUPPLEMENTARY DATA

Endocrine Associates, Carmelita Sorrelman, MSPH, Alfreda Beartrack, MSPH for the Navajo Area Indian Health Prevention Program

*Hawaii:* Beatriz L. Rodriguez, MD, PhD, Beth Waitzfelder, PhD, Wilfred Fujimoto, MD, J. David Curb, MD, Fiona Kennedy, RN, Greg Uramoto, MD, Sorrell Waxman, MD, Teresa Hillier, MD, Richard Chung, MD, for Kuakini Medical Center

*Ohio:* Lawrence M. Dolan, MD, Michael Seid, PhD, Elaine Urbina, MD, MS, Debra A. Standiford, MSN, CNP for the Cincinnati Children's Hospital Medical Center

*Carolina:* Elizabeth J. Mayer-Davis, PhD, Joan Thomas MS, RD for the University of North Carolina, Chapel Hill, Anwar Merchant, ScD, Angela D. Liese, PhD, MPH, , Robert R. Moran, PhD, Gladys Gaillard-McBride, RN, CFNP, Deborah Lawler, MT (ASCP), Malaka Jackson, MD for the University of South Carolina, Deborah Bowlby, MD, for the Medical University of South Carolina, James Amrhein, MD, for Greenville Hospital Systems, Pam Clark, MD for McLeod Pediatric Subspecialists, Mark Parker, MD for Pediatric Endocrinology & Diabetes Specialists, Charlotte, NC, Pediatric Endocrinology at the Medical College of Georgia *Washington:* Catherine Pihoker, MD, Maryam Afkarian, MD, Angela Badaru, MD, Lisa Gilliam, MD, PhD, Irl Hirsch, MD, Lenna L. Liu, MD, MPH, John Neff, MD, and Joyce Yi-Frazier, PhD for the University of Washington, Beth Loots, MPH, MSW, Rebecca O'Connor, RN, Sue Kearns, RN, Sharla Semana, BS, and Mona Yaptangco, BS for Seattle Children's Hospital, and Carla Greenbaum, MD for Benaroya Research Institute

*Centers for Disease Control and Prevention:* Giuseppina Imperatore, MD, PhD, Desmond E. Williams, MD, PhD, Henry S. Kahn, MD, Bernice Moore, MBA, Gregg W. Edward, PhD, Sharon H. Saydah, PhD

*National Institute of Diabetes and Digestive and Kidney Diseases, NIH:* Barbara Linder, MD, PhD

*Central Laboratory (University of Washington):* Santica M. Marcovina, PhD, ScD, Vinod P. Gaur, PhD, Kathy Gadbois

*Coordinating Center (Wake Forest University School of Medicine):* Ronny Bell, PhD, MS, Ralph D'Agostino, Jr., PhD, Bettina Beech, PhD, Douglas Case, PhD, Timothy Morgan, PhD, Michelle J. Naughton, PhD, Susan Moxley, BS, Gena Hargis, MPH, Donna Kronner, Andrea Anderson, MS, Cralen Davis, MS, Jeanette Andrews, MS, Jennifer W. Talton, MS

The SEARCH for Diabetes in Youth Study is indebted to the many youth and their families, and their health care providers, whose participation made this study possible.

The authors wish to acknowledge the involvement of General Clinical Research Centers (GCRC) at the South Carolina Clinical & Translational Research (SCTR) Institute, at the Medical University of South Carolina (NIH/NCRR Grant number UL1RR029882); Children's Hospital and Regional Medical Center (Grant Number M01RR00037); Colorado Pediatric General Clinical Research Center (Grant Number M01 RR00069) and the Barbara Davis Center at the University of Colorado at Denver (DERC NIH P30 DK57516); and the Institutional Clinical and Translational Science Award (CTSA), NIH/NCRR at the University of Cincinnati (Grant Number 1UL1RR026314-01).

The contents of this paper are solely the responsibility of the authors and do not necessarily represent the official views of the Centers for Disease Control and Prevention and the National Institute of Diabetes and Digestive and Kidney Diseases.

## SUPPLEMENTARY DATA

### **Members of Swediabkids**

Bengt-Olof Samuelsson (Borås), Ulf Söderström (Eskilstuna), Anna Olivecrona (Falun), Åke Stenberg (Gällivare), Lars Skogsberg (Gävle), Gun Forsander (Göteborg), Nils Östen Nilsson (Halmstad), Jan Neiderud (Helsingborg), Karin Malmgren (Jönköping), Göran Lundström (Kalmar), Magnus Ljungcrantz (Karlskrona), Eva Albinsson (Karlstad), Karin Larsson (Kristianstad), Christer Gundewall (Kungsbacka), Rebecka Enander (Lidköping), Ulf Samuelsson (Linköping), Agneta Brännström (Luleå), Annelie Carlsson (Lund), Helena Larsson (Malmö), Maria Nordwall (Norrköping), Lennart Hellenberg (Nyköping), Elena Lundberg (Skellefteå), Henrik Tollig (Skövde), Britta Björsell (Sollefteå), Eva Örtqvist (Stockholm/KS), Torun Torbjörnsdotter (Stockholm/Huddinge), Anna Wennberg (Stockholm/Sachsska), Björn Stjernstedt (Sundsvall), Nils Wramner (Trollhättan), Ragnar Hanas (Uddevalla), Ingemar Swenne (Uppsala), Margareta Blomgren (Visby), Anders Thåström (Västervik), C-G Arvidsson (Västerås), Stig Edvardsson (Växjö), Björn Jönsson (Ystad), Torsten Gadd (Ängelholm), Marianne Kroon (Örebro), Rein Florell (Örnsköldsvik), Anna Lena Fureman (Östersund).

SUPPLEMENTARY DATA

**Supplementary Figure 1. Flow diagram of subjects in the TEDDY study from the time of birth (screening), through enrolment, antibody positivity, and development of diabetes in 80 young children (79 <5 years). HLA = Human Leukocyte Antigen, FDR = First Degree Relative, GP = General Population.**

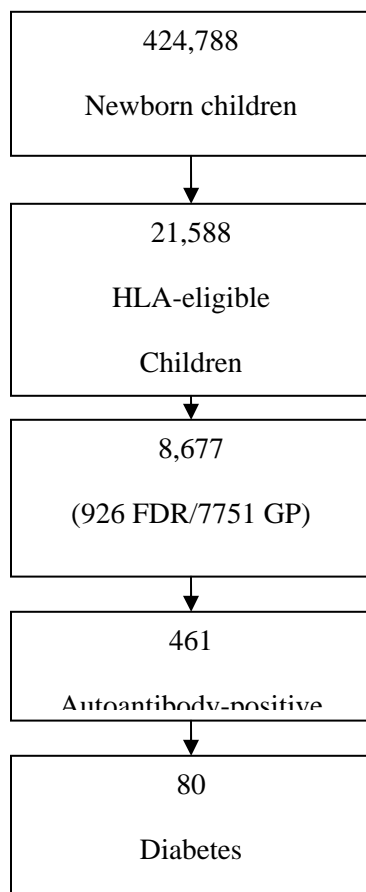

Supplement: dc111026supplementarydata.pdf [file dc111026supplementarydata.pdf]
